# Supplementary material
Source: PubMed Central journal article supplement (PMC5650077)
Supplement: NIHMS910106-supplement.pdf [file NIHMS910106-supplement.pdf]

## **Supplemental Information**

### **MYC and MCL1 cooperatively promote chemotherapy-resistant breast cancer stem cells through regulation of mitochondrial oxidative phosphorylation**

Kyung-min Lee, Jennifer M. Giltane, Justin M. Balko, Luis J. Schwarz, Angel L. Guerrero-Zotano, Katherine E. Hutchinson, Melissa J. Nixon, Mónica V. Estrada, Violeta Sánchez, Melinda E. Sanders, Taekyu Lee, Henry Gómez, Ana Lluch, J. Alejandro Pérez-Fidalgo, Melissa Magdalene Wolf, Gabriela Andrejeva, Jeffrey C. Rathmell, Stephen W. Fesik, Carlos L. Arteaga

Figure S1

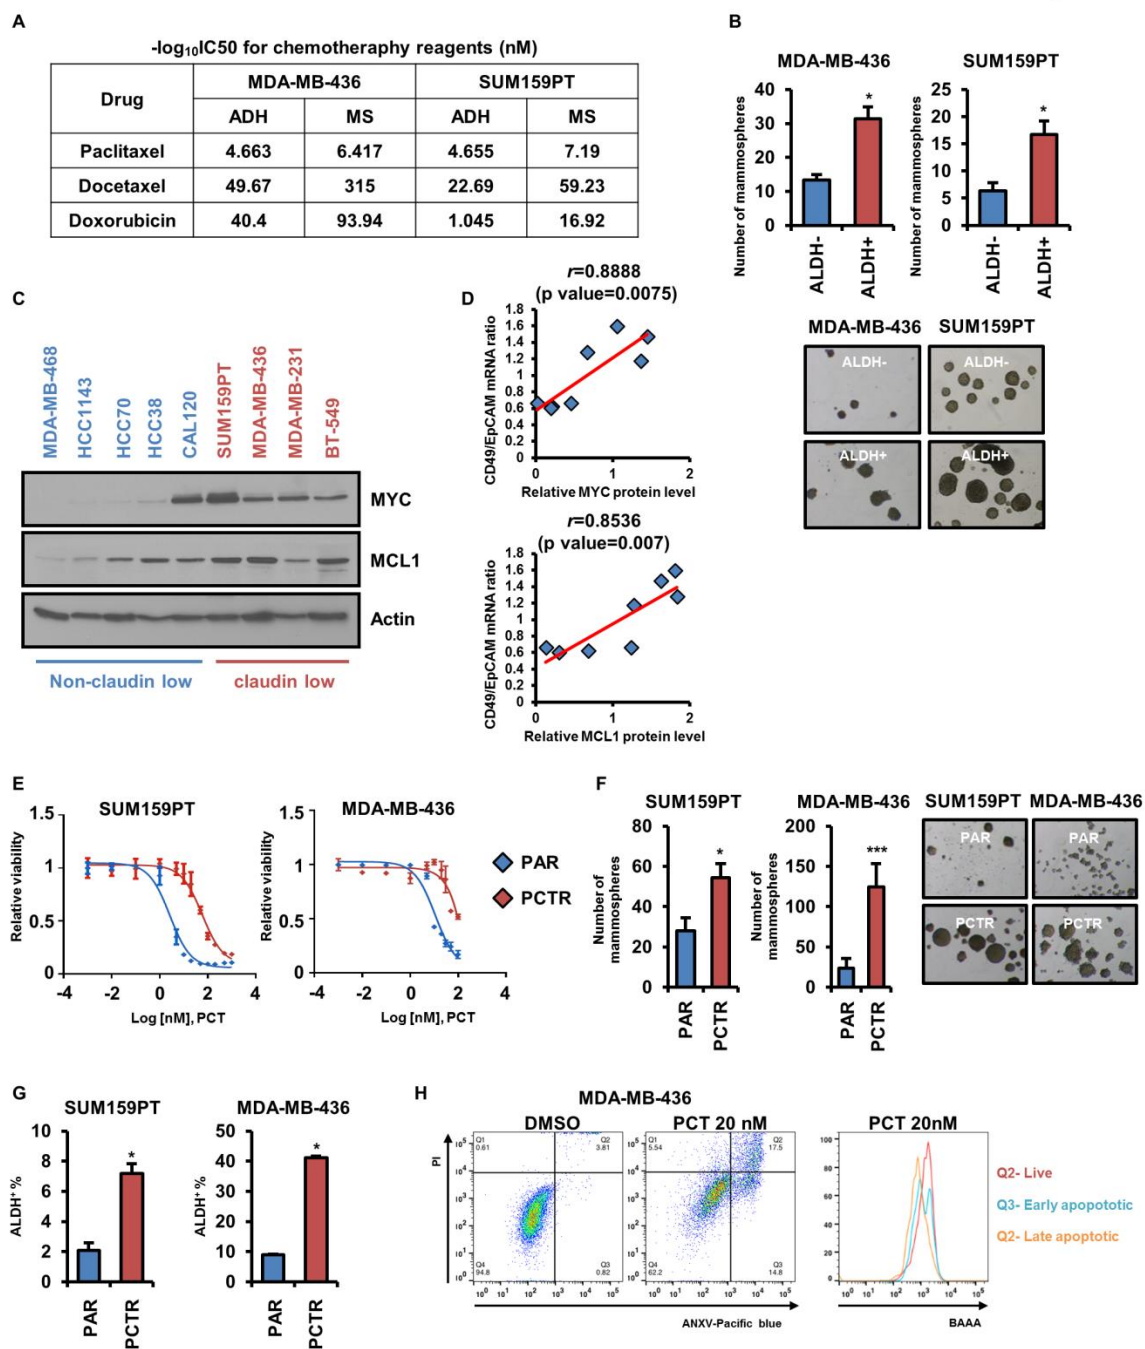

**Figure S1, related to Figure 1. Expression of MYC and MCL1 in TNBC cell lines and establishment of paclitaxel resistant cells.** (A) MDA-MB-436 and SUM159PT cells grown as mammospheres or as adherent monolayers were treated with the indicated dose range of paclitaxel, docetaxel, or doxorubicin for 72 h. Cell viability was determined with the SRB assay as described in Methods. IC<sub>50</sub> values were calculated with the GraphPad Prism 7. (B) ALDH<sup>+</sup> MDA-MB-436 and SUM159PT cells sorted by flow cytometry were seeded in mammosphere assays for 7 days (\**p*<0.005). Total number of the mammosphere was quantified using the Gelcount mammalian cell colony counter. Original magnification, x100. (C) Lysates obtained from TNBC cell lines were subjected to immunoblot analysis with MYC, MCL1, and actin antibodies. (D) Plots of MYC or MCL1 protein levels vs. CD49:EpCAM mRNA ratio in TNBC cell lines (Pearson's correlation). (E) Paclitaxel resistant (PCTR) and parental (PAR) MDA-MB-436 and SUM159PT cells were treated with paclitaxel for 72 h; cell viability was determined with SRB assay. (F) Paclitaxel resistant and parental SUM159PT cells were seeded as mammospheres for 7 days (\**p*<0.05). (G) Proportion of ALDH<sup>+</sup> cells was determined by flow cytometry (\**p*<0.0005). (H) MDA-MB-436 cells stained with BODIPY-aminoacetaldehyde (BAAA) were labeled with annexin V pacific blue<sup>TM</sup> and propidium iodide (PI). Proportion of each fraction was determined by flow cytometry. Data are represented as mean ± SD.

Figure S2

A

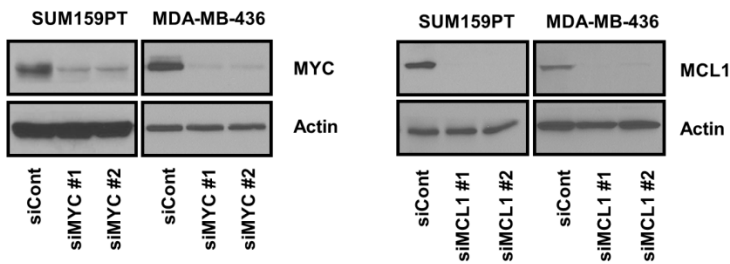

B

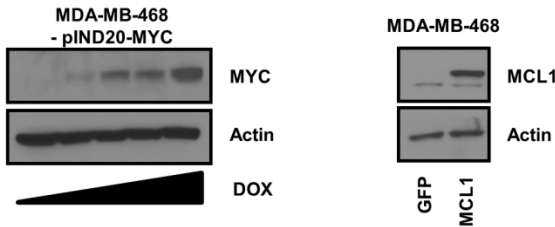

C

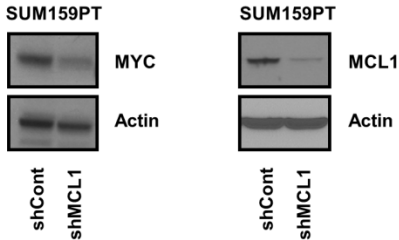

**Figure S2, related to Figure 2. Modulation of MYC and MCL1 expression in TNBC cell lines.** (A) Lysates from SUM159PT and MDA-MB-436 cells transduced with *MYC* or *MCL1* siRNA were subjected to immunoblot analysis with MYC, MCL1, and actin antibodies. (B) MDA-MB-468 cells transduced by pINDUCER20-MYC were treated with 0, 1, 10, 100, 500 ng/ml doxycycline (DOX) for 48 h to induce MYC expression. MDA-MB-468 cells were also transduced with pLX302-MCL1. Cell lysates were subjected to immunoblot analysis with MYC, MCL1, and actin antibodies. (C) Lysates of SUM159PT cells stably transduced either by *MYC* or *MCL1* shRNA were subjected to immunoblot analyses with MYC, MCL1, and actin antibodies.

Figure S3

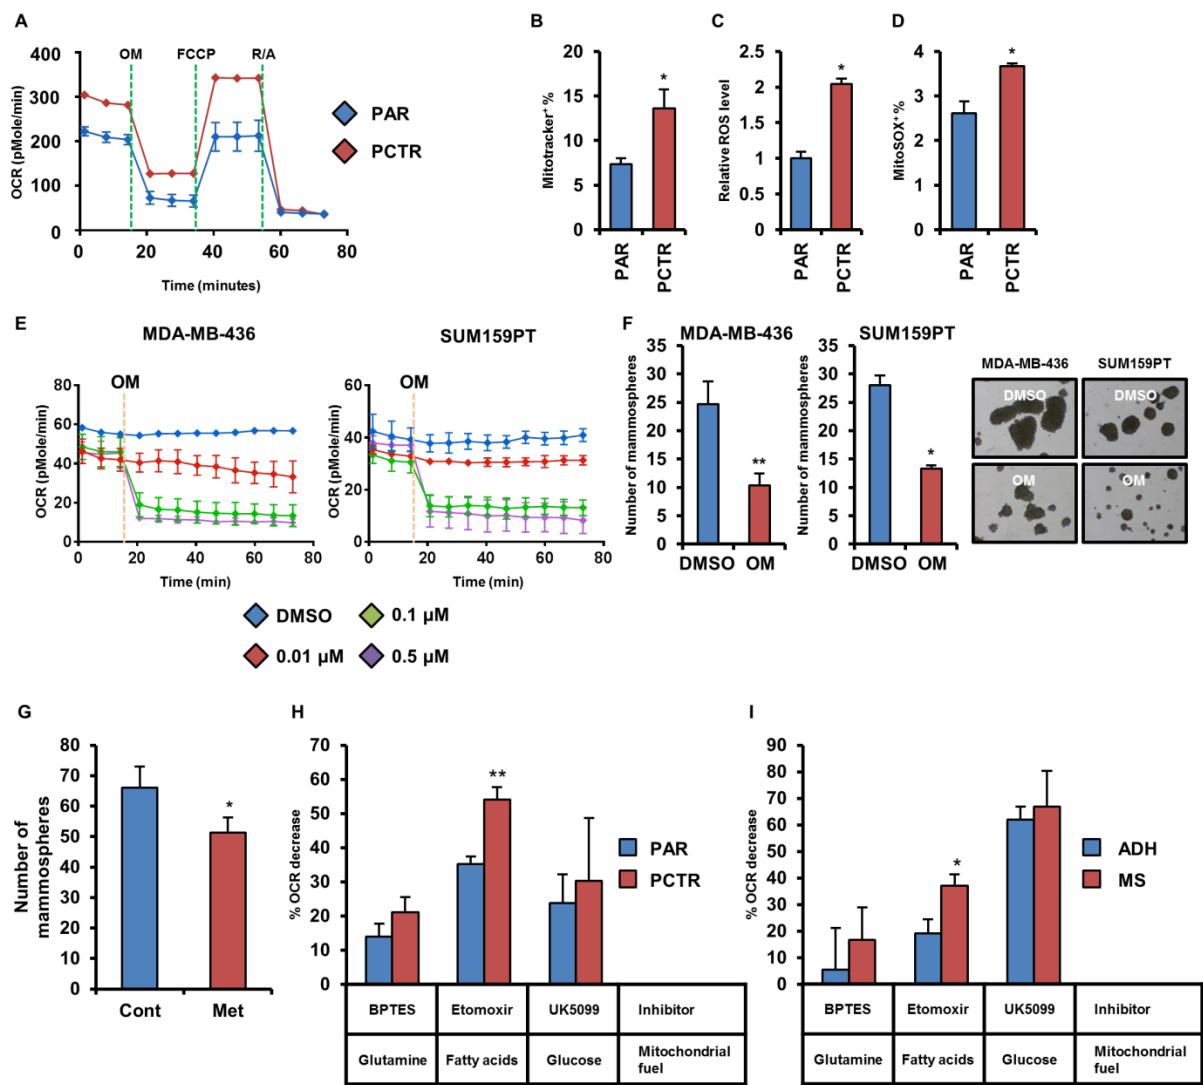

**Figure S3, related to Figure 3. Inhibition of mtOXPHOS reduces enrichment of CSCs.** (A) OCRs were measured by Seahorse XF<sup>c</sup>96 extracellular flux analyzer in paclitaxel-resistant (PCTR) and parental SUM159PT cells (PAR). (B) Paclitaxel resistant and sensitive parental SUM159PT cells were stained with Mitotracker Red CMXRos and next analyzed by flow cytometry (\* $p < 0.05$ ). (C) ROS levels were determined by ROS-Glo in the paclitaxel resistant and parental SUM159PT cells (\* $p < 0.0005$ ). (D) Paclitaxel resistant and parental SUM159PT cells stained with MitoSOX<sup>TM</sup> Red were analyzed by flow cytometry (\* $p < 0.005$ ). (E) OCRs were determined by Seahorse XF<sup>c</sup>96 extracellular flux analyzer in MDA-MB-436 and SUM159PT cells treated with 0.01, 0.1, and 0.5  $\mu$ M oligomycin A (OM). (F) MDA-MB-436 and SUM159PT cells were seeded in mammosphere assays and treated with DMSO or 0.1  $\mu$ M oligomycin A (OM) for 7 days (\* $p < 0.005$ , \*\* $p < 0.0005$ ). (G) PCTR SUM159PT cells were seeded for mammosphere assays as described in Methods in presence of DMSO or 3 mM Metformin (Met, \* $p < 0.005$ ). (H,I) OCR in PCTR and PAR SUM159PT cells was measured by Seahorse XF<sup>c</sup>96 extracellular flux analyzer in presence of 4  $\mu$ M BPTES, 2  $\mu$ M etomoxir or 3  $\mu$ M UK5099 (H). OCR in SUM159PT cells grown as mammospheres (MS) or as adherent monolayers was measured as described in H (I). Y axis shows % decrease in OCR in cells treated with a specific fuel oxidation inhibitor (BPTES, etomoxir or UK5099) relative to the % decrease in OCR in cells treated with the other two inhibitors. PCTR cells and SUM159PT cells grown as mammospheres exhibited a statistically higher inhibition of OCR when treated with etomoxir, an inhibitor of fatty acid oxidation, compared to cells treated with BPTES and UK5099 (\* $p < 0.005$ , \*\* $p < 0.0005$ ). Data are represented as mean  $\pm$  SD.

Figure S4

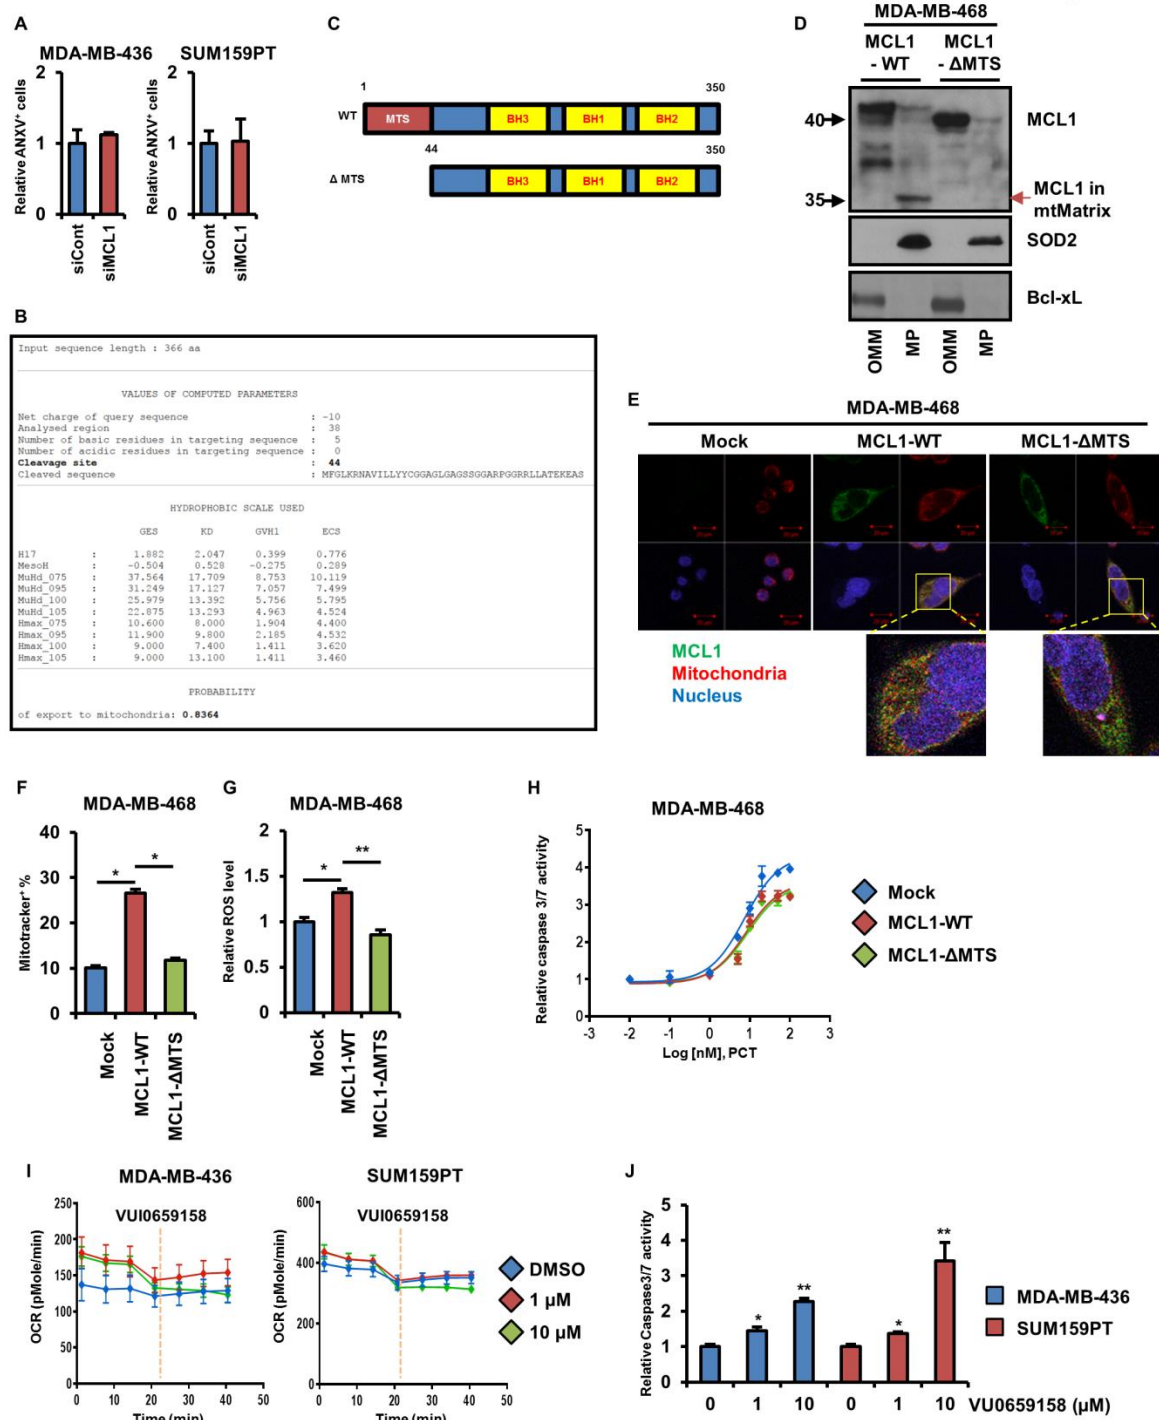

**Figure S4, related to Figure 5. Deletion of MTS in MCL1 reduces MCL1-mediated mtOXPHOS.**

(A) MDA-MB-436 and SUM159PT cells were transfected with MCL1 siRNA for 48 h. At this time, apoptotic cells were determined by annexin V staining. (B) MTS in human MCL1 was determined by *in silico* analysis. (C) Schema of wild type (WT) MCL1 and mutant MCL1 lacking its N-terminal MTS ( $\Delta$ MTS). (D) Fractions from outer mitochondrial membrane (OMM) and mitoplast (MP) were obtained by mitochondrial sub-fractionation as described in Experimental Procedures. SOD2 and Bcl-xL were used as markers for MP and OMM, respectively. (E) MDA-MB-468 cells stably expressing MCL1-WT or MCL- $\Delta$ MTS were stained with the nuclear marker TOPRO3 (blue), MCL1 antibody (green) and Mitotracker Red CMXRos (red). Absence of yellow dots in cells transfected with MCL- $\Delta$ MTS denotes inability of MCL1 to localize in mitochondria. (F) Proportion of Mitotracker Red CMXRos<sup>+</sup> cells were determined by flow cytometry (\* $p$ <0.0005). (G) ROS levels were measured by ROS-Glo (\* $p$ <0.005, \*\* $p$ <0.0005). (H) Caspase 3/7 activities were determined by Caspase-Glo 3/7 Assay in presence increasing doses of paclitaxel. (I) OCRs were determined by Seahorse XF<sup>®</sup>96 extracellular flux analyzer in MDA-MB-436 and SUM159PT cells treated with VU0659158. (J) Caspase 3/7 activities were determined by Caspase-Glo 3/7 Assay in MDA-MB-436 and SUM159PT cells treated with VU0659158 for 24 h (\* $p$ <0.05, \*\* $p$ <0.005). Data are represented as mean  $\pm$  SD.

Figure S5

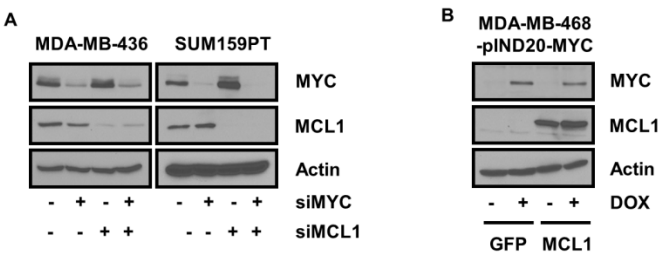

**Figure S5, related with Figure 6. Modulation of MYC and MCL1 expression in TNBC cell lines.** (A) Lysates from MDA-MB-436 and SUM159PT cells transduced with *MYC* and/or *MCL1* siRNA were subjected to immunoblot analysis to confirm knockdown. (B) Lysates from MDA-MB-468 cells stably transduced with both pINDUCER20-MYC and pLX302-MCL1 were subjected to immunoblot analysis to confirm modulation of MYC and/or MCL1 expression.

Figure S6

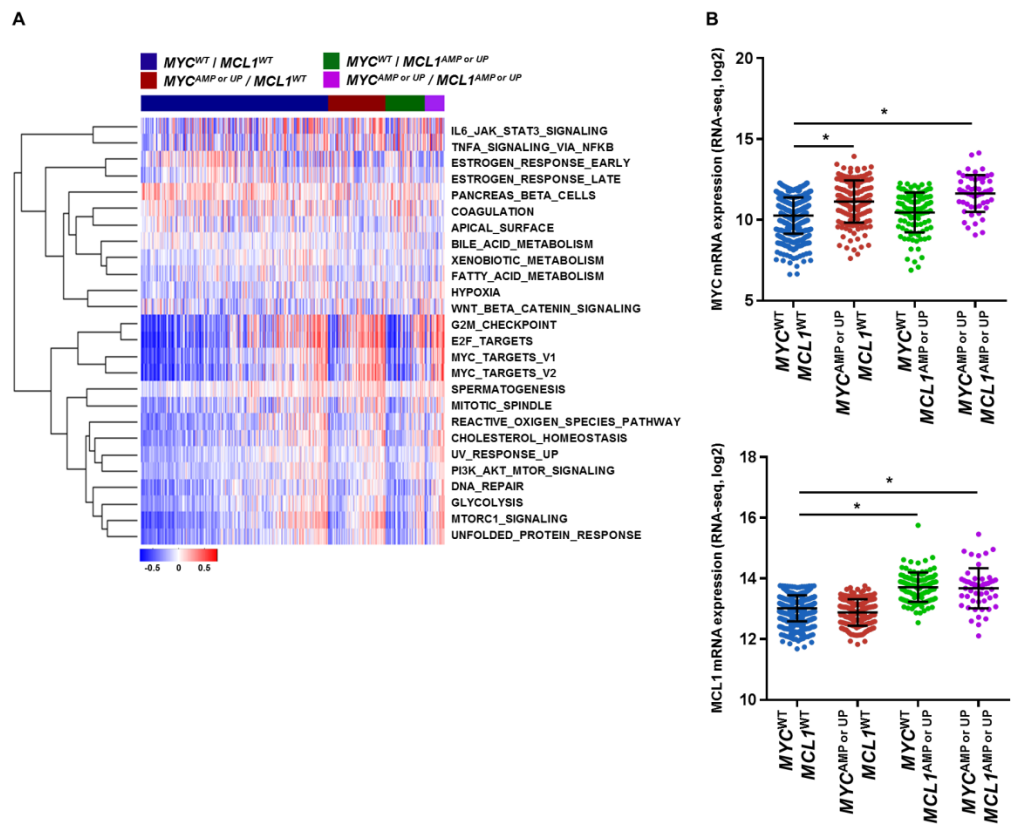

**Figure S6, related to Figure 6. Pathway analysis in breast tumors with *MYC* and/or *MCL1* alterations.** (A) Hallmark gene sets enriched in breast tumor with *MYC* and/or *MCL1* amplifications and/or mRNA upregulations were determined using Gene Set Variation Analysis (GSVA). Heatmap shows significantly enriched gene sets ( $q < 0.05$ ). (B) *MYC* and *MCL1* mRNA levels from TCGA breast tumors were plotted ( $*p < 0.0005$ ). Data are represented as mean  $\pm$  SD.

Figure S7

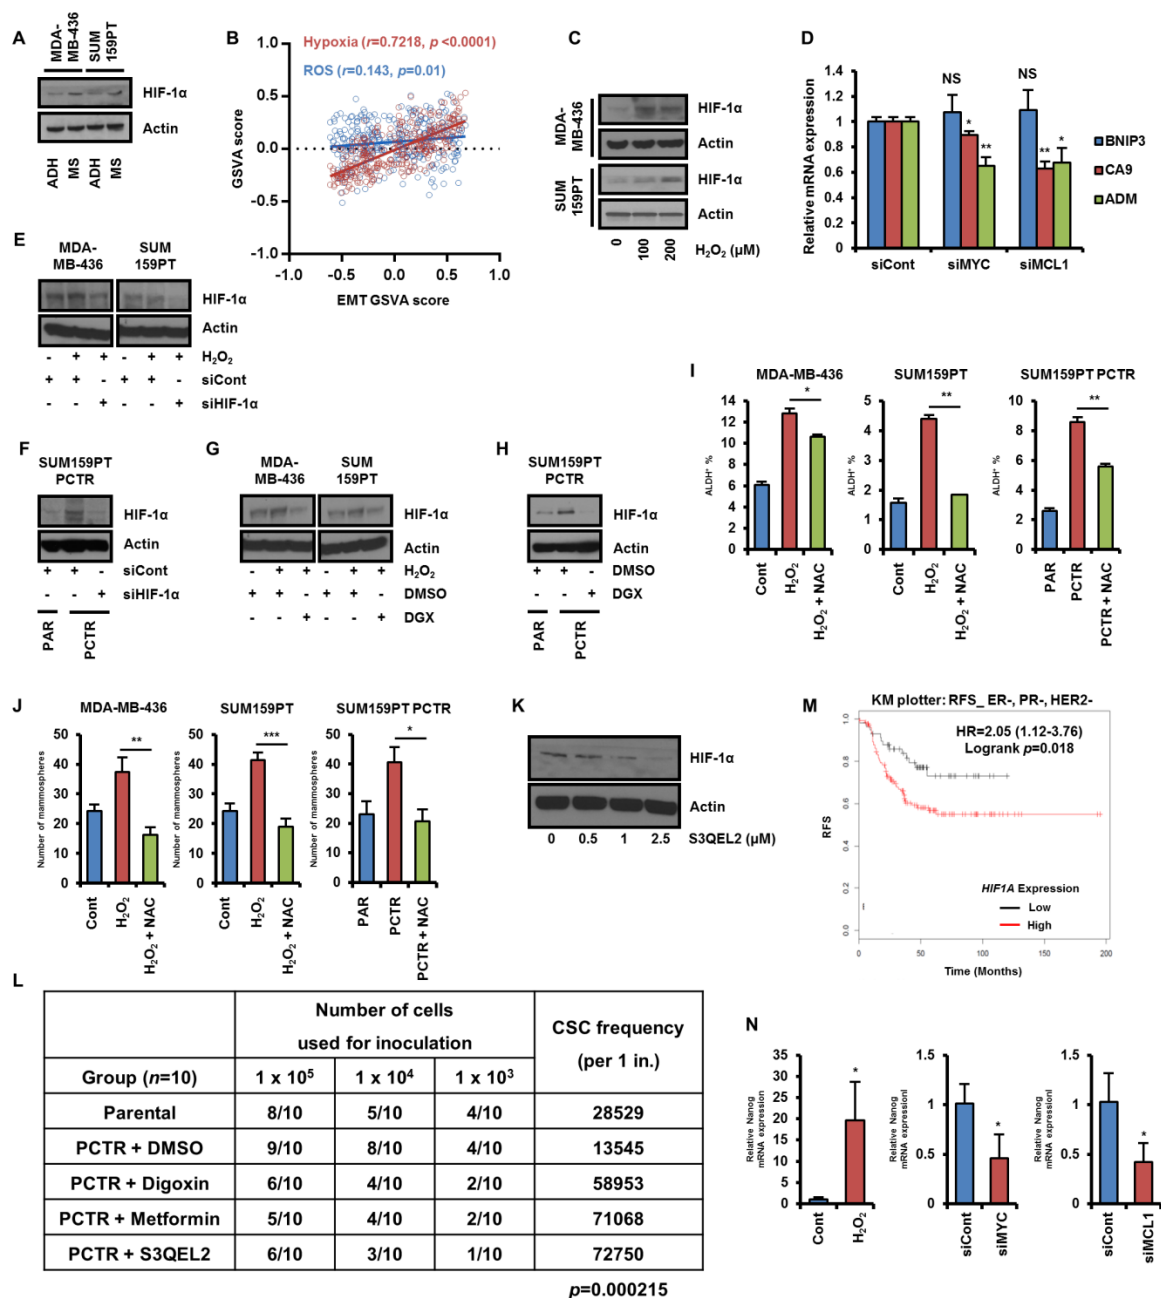

**Figure S7, related to Figure 7. Role of HIF-1 $\alpha$  in CSC enrichment and chemotherapy resistance in TNBC.** (A) MDA-MB-436 and SUM159PT cells were grown as mammospheres (MS) or in adherent condition (ADH). Lysates of these cells were subjected to immunoblot analysis. (B) Plots of EMT GSVA scores vs. Hypoxia or ROS GSVA scores in TNBCs from METABRIC (Pearson's correlation). (C) Lysates of MDA-MB-436 and SUM159PT cells treated with 0, 100 or 200  $\mu$ M hydrogen peroxide ( $H_2O_2$ ) for 72 h were subjected to immunoblot analysis with the indicated antibodies. (D) mRNA expressions of *BNIP3*, *CA9*, and *ADM* were determined by RT-qPCR in SUM159PT cells transfected with *MYC* siRNA or *MCL1* siRNA for 4 days (\* $p$ <0.05, \*\* $p$ <0.005). (E,F) MDA-MB-436 and SUM159PT cells were transduced with *HIF1A* siRNA  $\pm$  200  $\mu$ M  $H_2O_2$  for 48 h (E) and PCTR SUM159PT cells were transduced with *HIF1A* siRNA (F). Lysates of these cells were prepared and subjected to immunoblot analysis. (G,H) MDA-MB-436 and SUM159PT cells were treated with 100 nM digoxin  $\pm$  200  $\mu$ M  $H_2O_2$  for 48 h (G) and PCTR SUM159PT cells were treated with 100 nM digoxin for 48 h (H). Lysates of these cells were prepared and subjected to immunoblot analysis with the indicated antibodies. (I) MDA-MB-436 and SUM159PT cells were treated with 200  $\mu$ M  $H_2O_2$   $\pm$  1 mM N-AC for 4 days and then were subjected to ALDH assay. PCTR SUM159PT cells were treated with 1 mM N-AC for 4 days and then subjected to ALDH assay (\* $p$ <0.005, \*\* $p$ <0.0005). (J) MDA-MB-436 and SUM159PT were cells treated with 200  $\mu$ M  $H_2O_2$   $\pm$  1 mM NAC for 4 days and then seeded in a mammosphere assay for 7 days. PCTR SUM159PT cells were treated with 1 mM NAC for 4 days and then seeded in a mammosphere assay for 7 days (\* $p$ <0.05, \*\* $p$ <0.005, \*\*\* $p$ <0.0005). (K) Lysates of PCTR SUM159PT cells that had been treated with S3QEL2 for 48 h were prepared and subjected to immunoblot analysis with HIF-1 $\alpha$  and actin antibodies. (L) Parental SUM159PT and PCTR SUM159PT cells treated with DMSO, digoxin, metformin, or S3QEL2 for 7 days were serially diluted and then injected subcutaneously (s.c.) in the lateral dorsum of athymic female mice for ELDA. (M) Kaplan-Meier plot curve assessing RFS of patients with TNBC as a function of *HIF1A* mRNA expression. (N) *Nanog* mRNA expression was determined by RT-qPCR in MDA-MB-436 cells treated with 200  $\mu$ M  $H_2O_2$  or transfected with *MYC* siRNA or *MCL1* siRNA for 4 days. Data are represented as mean  $\pm$  SD.
